# Supplementary material for: High-Throughput High-Resolution Class I HLA Genotyping in East Africa
Source: PLoS One. 2010 May 20;5(5):e10751. doi: 10.1371/journal.pone.0010751 (PMC2873994; doi:10.1371/journal.pone.0010751)
Supplement: Table S1 — Reactivity patterns for HLA-B addressed alleles. (0.03 MB XLS) [file pone.0010751.s001.xls]

## Sheet: Table S1
Table S1. Reactivity patterns for HLA-B addressed alleles
Reaction	HLA-B Allele
	B*0702	B*0801	B*1302	B*1402	B*1503	B*1510	B*1516	B*1801	B*2703	B*3501	B*4101	B*4201	B*4202	B*4403	B*4501	B*4901	B*5101	B*5301	B*5701	B*5703	B*5801	B*5802	B*8101
HLA-B 001											X				X	X
HLA-B 002								X			X				X	X
HLA-B 003		X
HLA-B 004	X											X											X
HLA-B 005							X												X	X	X	X
HLA-B 006		X		X	X	X				X	X				X
HLA-B 007			X				X							X		X	X	X	X	X	X	X
HLA-B 008		X			X	X				X	X				X
HLA-B 009			X								X			X	X	X
HLA-B 010											X				X
HLA-B 011			X						X					X		X
HLA-B 012							X			X								X	X	X	X	X
HLA-B 013										X								X
HLA-B 014										X
HLA-B 015	X											X	X										X
HLA-B 016	X	X		X	X	X		X				X	X										X
HLA-B 017																	X
HLA-B 018		X						X		X		X	X	X				X			X
HLA-B 019																						X
HLA-B 020				X																		X
HLA-B 021							X			X					X	X		X			X	X
HLA-B 022			X							X					X	X		X			X	X
HLA-B 023															X
HLA-B 024	X				X	X			X										X	X			X
HLA-B 025	X	X		X	X	X		X	X		X	X	X	X			X		X	X			X
HLA-B 026					X	X								X			X		X	X
HLA-B 027		X									X	X	X				X			X			X
HLA-B 028			X														X			X			X
HLA-B 029																	X			X
HLA-B 030	X				X	X	X	X		X								X	X		X	X
HLA-B 031					X	X	X	X		X								X	X		X	X
HLA-B 032					X	X	X			X								X	X		X	X
HLA-B 033														X
HLA-B 034									X					X
HLA-B 035									X					X
HLA-B 036						X											X			X			X
HLA-B 037		X									X	X	X
HLA-B 038						X											X			X
HLA-B 039	X
HLA-B 040					X		X	X		X								X	X		X	X
HLA-B 041					X		X			X								X	X		X	X
HLA-B 042					X		X												X
HLA-B 043			X
HLA-B 044			X													X
HLA-B 045				X
HLA-B 046							X
