# Supplementary material for: High-Throughput High-Resolution Class I HLA Genotyping in East Africa
Source: PLoS One. 2010 May 20;5(5):e10751. doi: 10.1371/journal.pone.0010751 (PMC2873994; doi:10.1371/journal.pone.0010751)
Supplement: Table S4 — Expected reactivity patterns for 78 HLA-C genotypes among addressed alleles. (0.04 MB XLS) [file pone.0010751.s004.xls]

## Sheet: Table S4
Table S4. Expected reactivity patterns for 78 HLA-C genotypes among addressed alleles
HLA-C Genotype	HLA-C 001	HLA-C 002	HLA-C 003	HLA-C 004	HLA-C 005	HLA-C 006	HLA-C 007	HLA-C 008	HLA-C 009	HLA-C 010	HLA-C 011	HLA-C 012	HLA-C 013	HLA-C 014	HLA-C 015
Cw*0210/Cw*0210					X								X
Cw*0210/Cw*0302				X	X								X	X	X
Cw*0210/Cw*0304				X	X			X					X		X
Cw*0210/Cw*0401			X		X							X	X
Cw*0210/Cw*0602	X				X	X							X
Cw*0210/Cw*0701		X		X	X	X							X		X
Cw*0210/Cw*0702		X		X	X	X				X			X
Cw*0210/Cw*0704		X		X	X				X				X
Cw*0210/Cw*0802				X	X							X	X
Cw*0210/Cw*1601				X	X	X					X		X
Cw*0210/Cw*1701					X		X						X		X
Cw*0210/Cw*1801	X				X							X	X
Cw*0302/Cw*0302				X										X	X
Cw*0302/Cw*0304				X				X						X	X
Cw*0302/Cw*0401			X	X								X		X	X
Cw*0302/Cw*0602	X			X	X	X								X	X
Cw*0302/Cw*0701		X		X		X								X	X
Cw*0302/Cw*0702		X		X		X				X				X	X
Cw*0302/Cw*0704		X		X					X					X	X
Cw*0302/Cw*0802				X								X		X	X
Cw*0302/Cw*1601				X		X					X			X	X
Cw*0302/Cw*1701				X			X							X	X
Cw*0302/Cw*1801	X			X								X		X	X
Cw*0304/Cw*0304				X				X							X
Cw*0304/Cw*0401			X	X				X				X			X
Cw*0304/Cw*0602	X			X	X	X		X							X
Cw*0304/Cw*0701		X		X		X		X							X
Cw*0304/Cw*0702		X		X		X		X		X					X
Cw*0304/Cw*0704		X		X				X	X						X
Cw*0304/Cw*0802				X				X				X			X
Cw*0304/Cw*1601				X		X		X			X				X
Cw*0304/Cw*1701				X			X	X							X
Cw*0304/Cw*1801	X			X				X				X			X
Cw*0401/Cw*0401			X									X
Cw*0401/Cw*0602	X		X		X	X						X
Cw*0401/Cw*0701		X	X	X		X						X			X
Cw*0401/Cw*0702		X	X	X		X				X		X
Cw*0401/Cw*0704		X	X	X					X			X
Cw*0401/Cw*0802			X	X								X
Cw*0401/Cw*1601			X	X		X					X	X
Cw*0401/Cw*1701			X				X					X			X
Cw*0401/Cw*1801	X		X									X
Cw*0602/Cw*0602	X				X	X
Cw*0602/Cw*0701	X	X		X	X	X									X
Cw*0602/Cw*0702	X	X		X	X	X				X
Cw*0602/Cw*0704	X	X		X	X	X			X
Cw*0602/Cw*0802	X			X	X	X						X
Cw*0602/Cw*1601	X			X	X	X					X
Cw*0602/Cw*1701	X				X	X	X								X
Cw*0602/Cw*1801	X				X	X						X
Cw*0701/Cw*0701		X		X		X									X
Cw*0701/Cw*0702		X		X		X				X					X
Cw*0701/Cw*0704		X		X		X			X						X
Cw*0701/Cw*0802		X		X		X						X			X
Cw*0701/Cw*1601		X		X		X					X				X
Cw*0701/Cw*1701		X		X		X	X								X
Cw*0701/Cw*1801	X	X		X		X						X			X
Cw*0702/Cw*0702		X		X		X				X
Cw*0702/Cw*0704		X		X		X			X	X
Cw*0702/Cw*0802		X		X		X				X		X
Cw*0702/Cw*1601		X		X		X				X	X
Cw*0702/Cw*1701		X		X		X	X			X					X
Cw*0702/Cw*1801	X	X		X		X				X		X
Cw*0704/Cw*0704		X		X					X
Cw*0704/Cw*0802		X		X					X			X
Cw*0704/Cw*1601		X		X		X			X		X
Cw*0704/Cw*1701		X		X			X		X						X
Cw*0704/Cw*1801	X	X		X					X			X
Cw*0802/Cw*0802				X								X
Cw*0802/Cw*1601				X		X					X	X
Cw*0802/Cw*1701				X			X					X			X
Cw*0802/Cw*1801	X			X								X
Cw*1601/Cw*1601				X		X					X
Cw*1601/Cw*1701				X		X	X				X				X
Cw*1601/Cw*1801	X			X		X					X	X
Cw*1701/Cw*1701							X								X
Cw*1701/Cw*1801	X						X					X			X
Cw*1801/Cw*1801	X											X
